# Supplementary material for: Transcriptional Coactivator TAZ Negatively Regulates Tumor Suppressor p53 Activity and Cellular Senescence
Source: MDPI journal article supplement (doi:10.3390/cells9010171), 2020-01-09
Supplement: s1 [file s1]

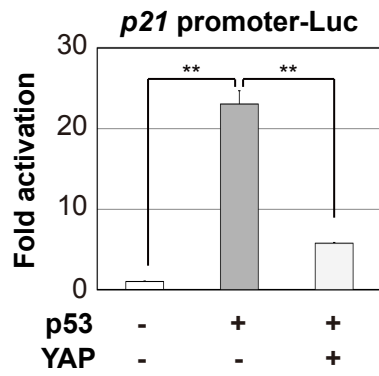

**Supplementary Figure S1.** YAP represses the transcriptional activity of p53. H1299 cells were transfected with a p53 reporter plasmid, *p21*-promoter Luc and pCMV/ $\beta$ -gal in combination with the indicated constructs. After 24 h, luciferase activity in cell lysates was measured and normalized with  $\beta$ -gal activity. Experiments were performed in triplicate, and data are represented as mean activation fold  $\pm$  S.D. Significant differences are indicated as \*\* $p < 0.01$ .

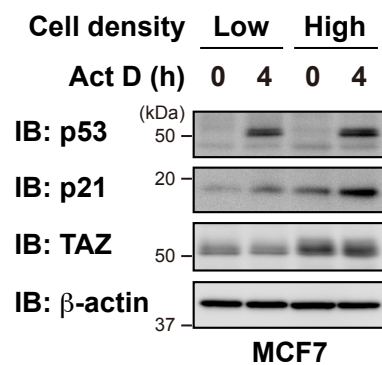

**Supplementary Figure S2.** MCF7 cells were cultured at low density ( $0.5 \times 10^5$  cells/well) or high density ( $1.0 \times 10^6$  cells/well). After 24 h, cells were treated with 10 nM actinomycin D (Act D) for 4 h. Cell lysates were analyzed by immunoblotting using the indicated antibodies.

**(A)**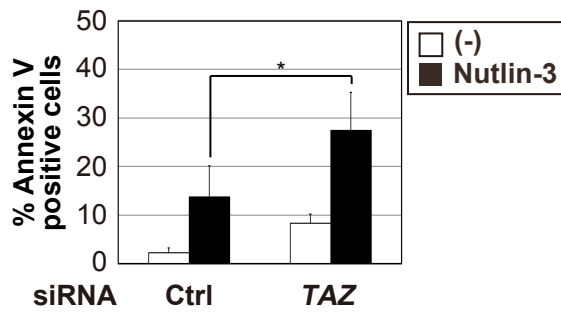**(B)**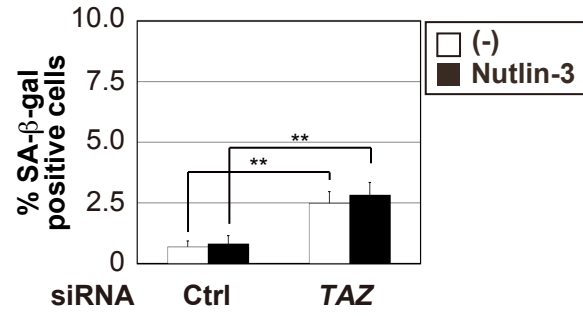

**Supplementary Figure S3.** MCF7 cells were transfected with the indicated siRNAs. After 48 h, cells were treated with 10  $\mu$ M Nutlin-3 for 48 h. Quantitation of apoptotic cell death was examined by Annexin V staining. Shown are average results from three experiments (A). Cells were then stained for senescence-associated  $\beta$ -gal (SA- $\beta$ -gal). The bar graph shows the percentage of SA- $\beta$ -gal-positive cells in the indicated culture (n=3) (B). Significant differences are indicated as \*\*p<0.01 and \*p<0.05.

(A)

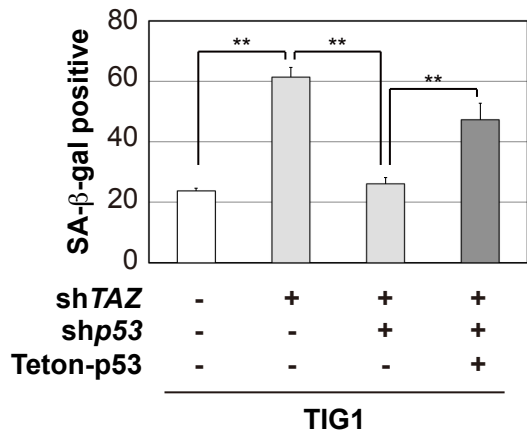

(B)

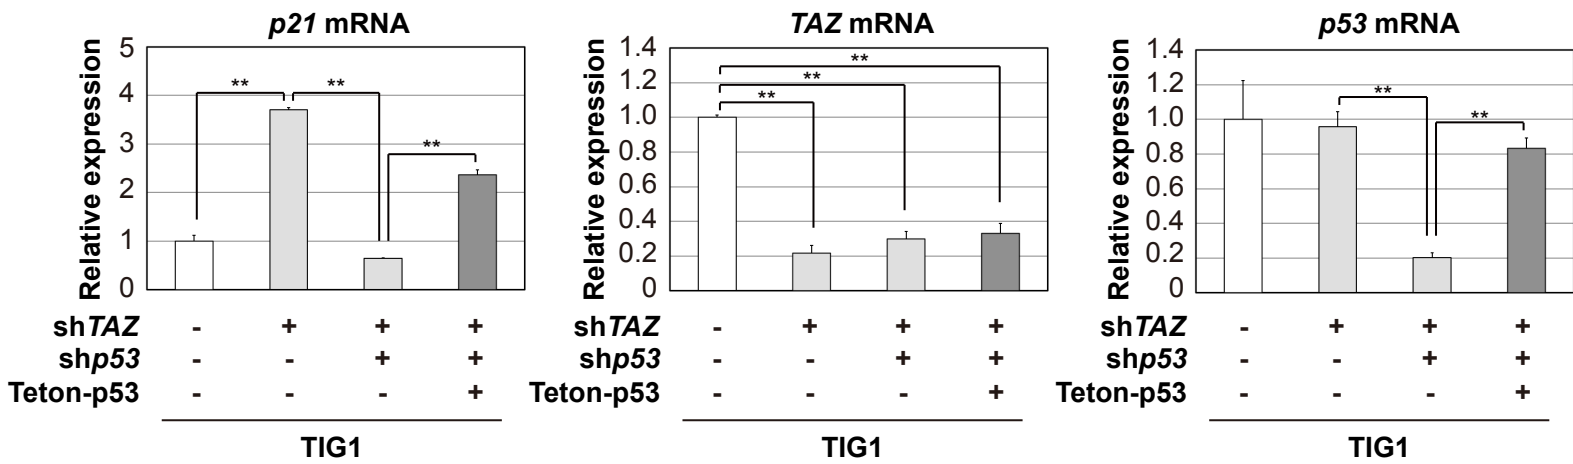

**Supplementary Figure S4.** TIG1 cells or TIG1/shp53 cells expressing Tetracycline-inducible p53 (Teton-p53) were infected with lentiviral vectors containing shRNA for *TAZ* (shTAZ) or control (shCtrl) in the presence (Teton-p53) or absence of doxycycline (1  $\mu$ g/ml) for 7 d. Cells were then stained for senescence-associated  $\beta$ -gal (SA- $\beta$ -gal). The bar graph shows the percentage of SA- $\beta$ -gal-positive cells in the indicated culture (n=3) (A). The expression of each gene was assessed by qPCR, and the mRNA levels of the indicated genes were normalized with  $\beta$ -actin mRNA. Result was shown as means  $\pm$  S.D. (n=3) (B). Significant differences are indicated as \*\*p<0.01.
